# Supplementary material for: Do Pluripotent Stem Cells Exist in Adult Mice as Very Small Embryonic Stem Cells?
Source: PubMed Central journal article supplement — Stem Cell Reports. 2013 Jul 24;1(2):198–208. doi: 10.1016/j.stemcr.2013.07.001 (PMC3757755; doi:10.1016/j.stemcr.2013.07.001), 2013-07-24
Supplement: mmc1.pdf [file mmc1.pdf]

# **Stem Cell Reports, Volume 1**

## **Supplemental Information**

### **Do Pluripotent Stem Cells Exist in Adult Mice as Very Small Embryonic Stem Cells?**

**Masanori Miyanishi, Yasuo Mori, Jun Seita, James Y. Chen, Seth Karten, Charles K.F. Chan, Hiromitsu Nakauchi, and Irving L. Weissman**

#### **Inventory of Supplemental Information:**

Figure S1: related to Figure 2

Figure S2: related to Figure 3

Figure S3: related to Figure 4

Figure S4: related to Figure 4

Table S1: related to Figure 1

Table S2: related to Figure 1

Table S3: related to Figure 3 and Experimental Procedures

**Figure S1**

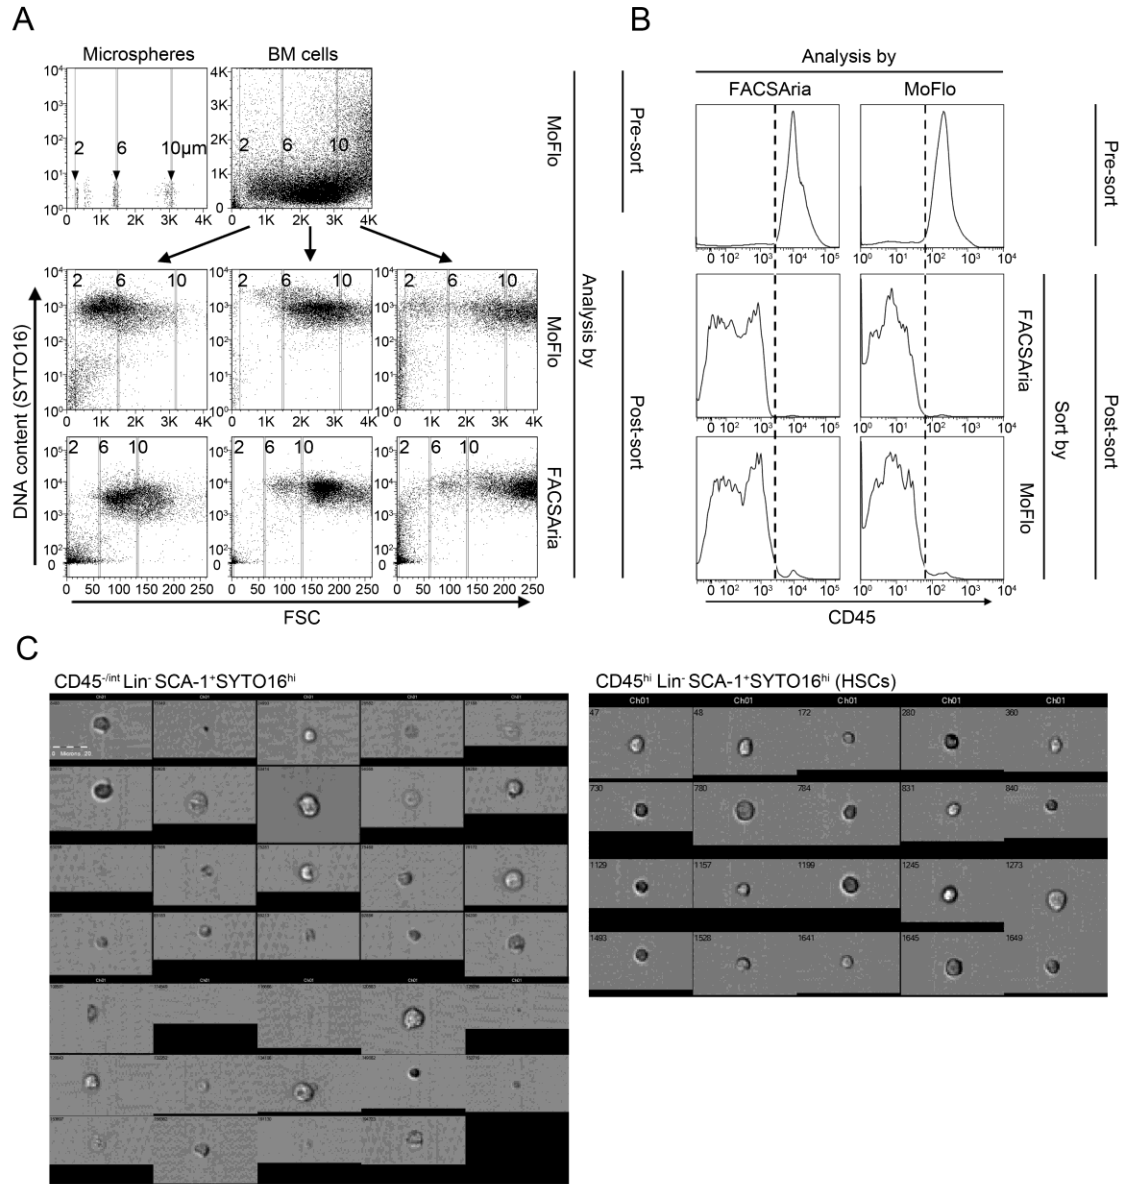

**Figure S1. Bone Marrow Cell Analysis with Different Flow Cytometers, Related to Figure 2.** (A) Representative re-analysis data of sorted BM cells. A MoFlo machine was used to sort events by FSC into 2-6, 6-10, and >10  $\mu\text{m}$  (expected-size) subgroups (upper). Each subgroup was re-analyzed with the MoFlo (middle) and FACSARIA (lower). Vertical lines indicate the positions of 2-, 6-, and 10- $\mu\text{m}$ -microspheres. (B) Representative re-analysis data of sorted  $\text{CD45}^{-/\text{int}}$  cells. These cells were sorted in parallel by FACSARIA and MoFlo, and then re-analyzed with both of these sorters. Dotted lines indicate the threshold between  $\text{CD45}^{-/\text{int}}$  and  $\text{CD45}^{\text{hi}}$ . (C) Images of  $\text{CD45}^{-/\text{int}}\text{Lin}^{-}\text{SCA-1}^{+}\text{SYTO16}^{\text{hi}}$  cells (candidate VSELs) and  $\text{CD45}^{\text{hi}}\text{Lin}^{-}\text{SCA-1}^{+}\text{SYTO16}^{\text{hi}}$  cells (HSCs) captured by flow cytometry imaging. Shown here are 34 candidate VSELs and 20 HSCs, randomly chosen. The dotted bar in the top-left image indicates 20  $\mu\text{m}$ .

Figure S2

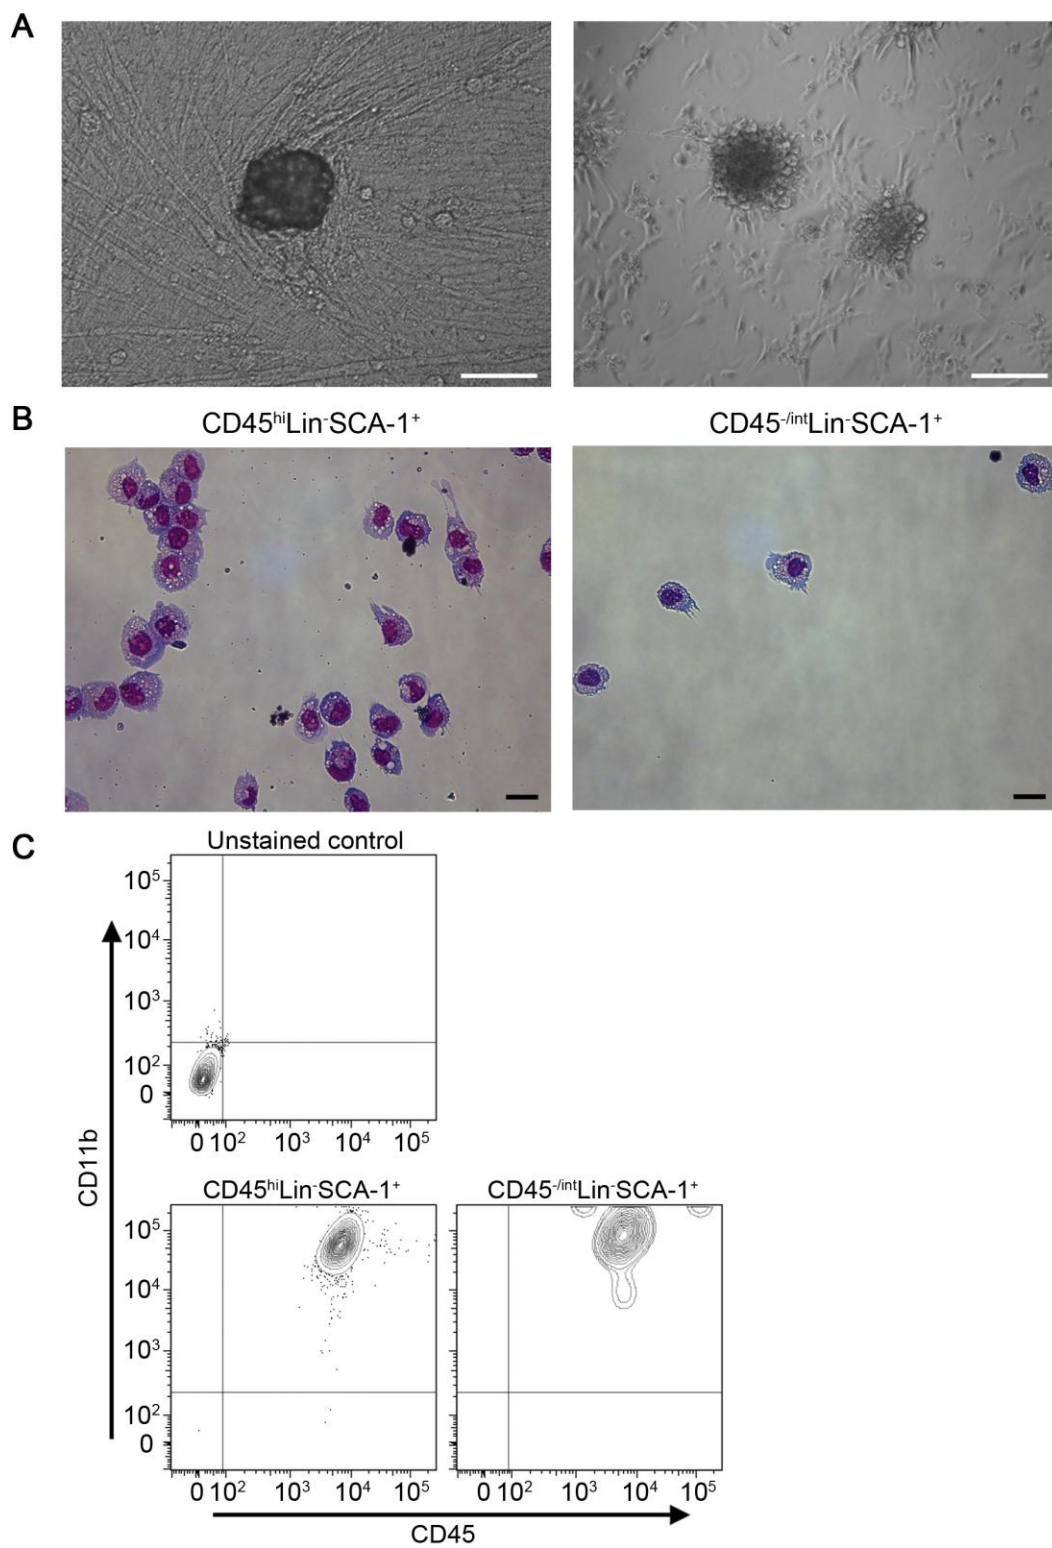

**Figure S2. Co-culture with the Myoblast C2C12 Cell Line, Related to Figure 3.** (A) Representative photographs of spontaneously aggregated C2C12 cells on day 10 of culture in 2% FCS. White scale bars, 100  $\mu\text{m}$ . (B) Representative photographs of cells derived from  $\text{CD45}^{\text{hi}}\text{Lin}^{-}\text{SCA-1}^{+}$  and  $\text{CD45}^{-/\text{int}}\text{Lin}^{-}\text{SCA-1}^{+}$  fractions (May-Giemsa staining; scale bars, 15  $\mu\text{m}$ ). (C) FACS analysis of the expression of CD45 (hematopoietic lineage marker) and CD11b (macrophage marker) in proliferating cells derived from  $\text{CD45}^{\text{hi}}\text{Lin}^{-}\text{SCA-1}^{+}$  (lower left) and  $\text{CD45}^{-/\text{int}}\text{Lin}^{-}\text{SCA-1}^{+}$  (lower right) cells.

**Figure S3**

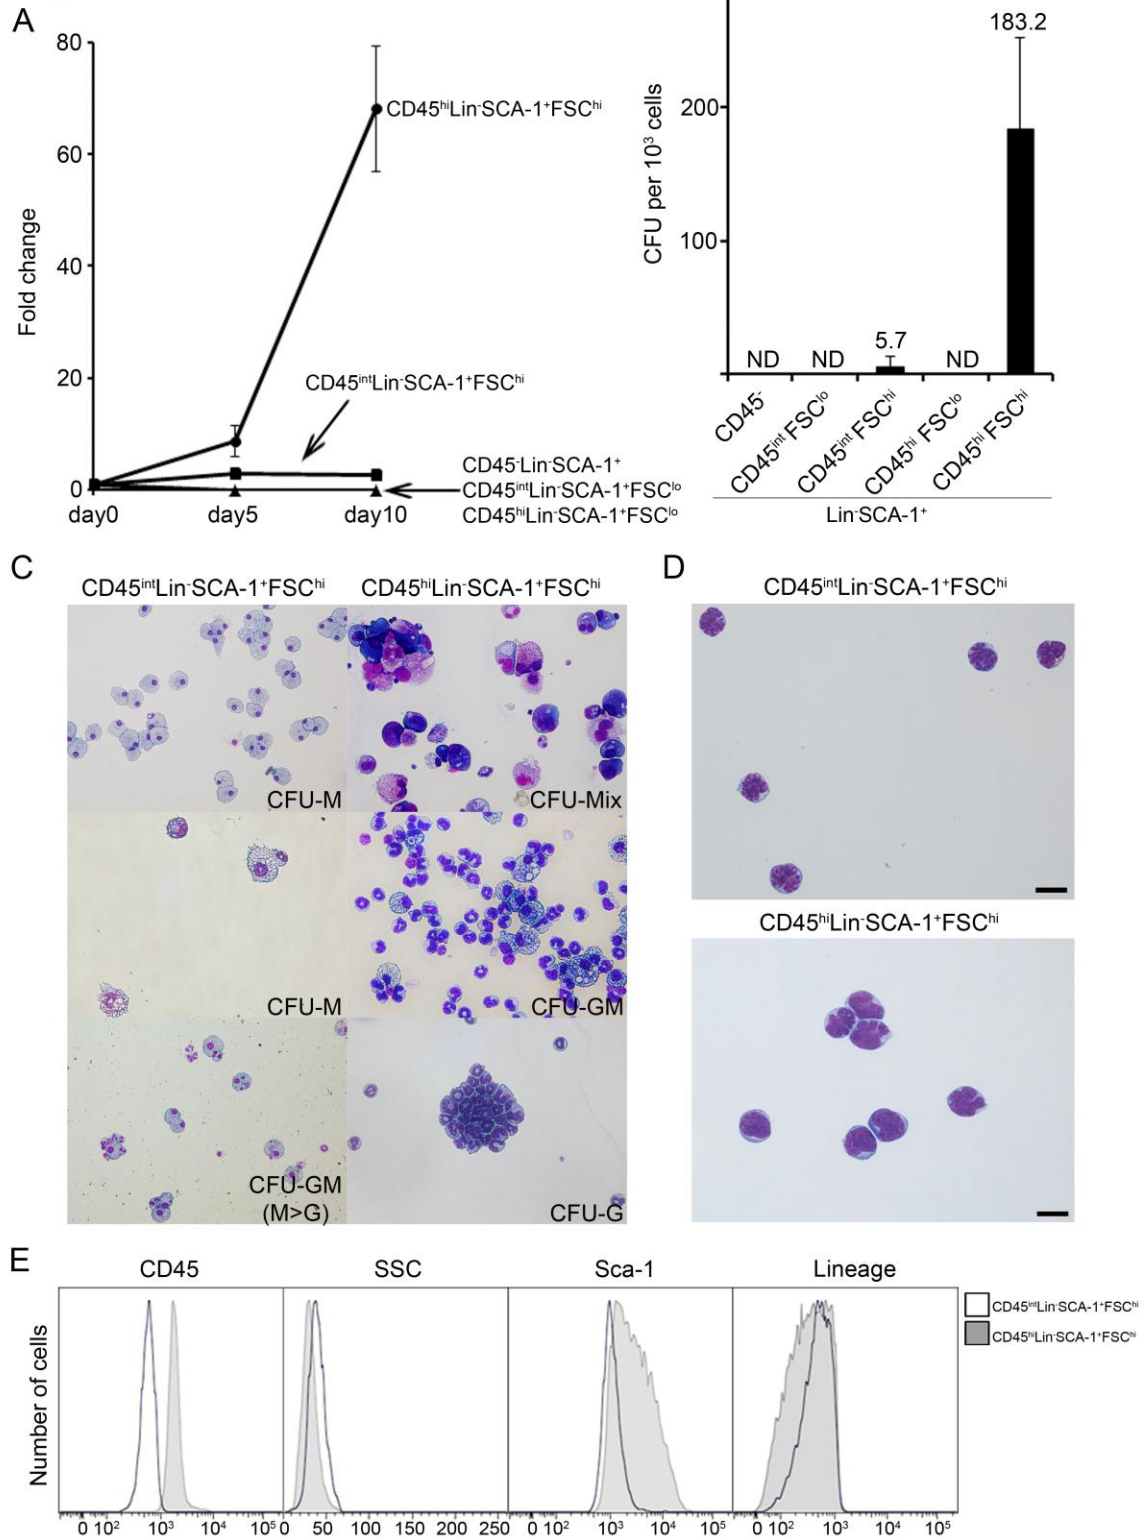

**Figure S3. *In vitro* Assessment of Hematopoietic Lineage Potential among Candidate VSELs, Related to Figure 4.** (A) Results of cell proliferation in a liquid culture. Lin<sup>-</sup>SCA-1<sup>+</sup> cells were cultured in IMDM plus 10% FCS supplemented with 10 ng/ml of SCF, IL-3, and Flt3 ligand. Shown are the mean ± SD from three independent experiments. (B) Representative methylcellulose colony assays of FACS-purified populations. Hematopoietic colonies developed only from CD45<sup>int</sup>Lin<sup>-</sup>SCA-1<sup>+</sup>FSC<sup>hi</sup> and CD45<sup>hi</sup>Lin<sup>-</sup>SCA-1<sup>+</sup>FSC<sup>hi</sup> cells. Data shown here are mean ± SD in five independent experiments. CFU, colony-forming unit; ND, not detected. (C) Representative photographs of cell components of colonies derived from each Lin<sup>-</sup>SCA-1<sup>+</sup> fraction indicated. (May-Giemsa staining). CFU-M, CFU-macrophage; CFU-Mix, CFU-erythroid and myeloid cells; CFU-GM, CFU-granulocytes/macrophages; CFU-G, CFU-granulocytes. Scale Bar, 20 μm. (D) Morphological and (E) immunophenotypical comparisons of freshly-isolated CD45<sup>int</sup>Lin<sup>-</sup>SCA-1<sup>+</sup>FSC<sup>hi</sup> and CD45<sup>hi</sup>Lin<sup>-</sup>SCA-1<sup>+</sup>FSC<sup>hi</sup> cells. Scale bars, 10 μm. These data were similar in three independent experiments.

Figure S4

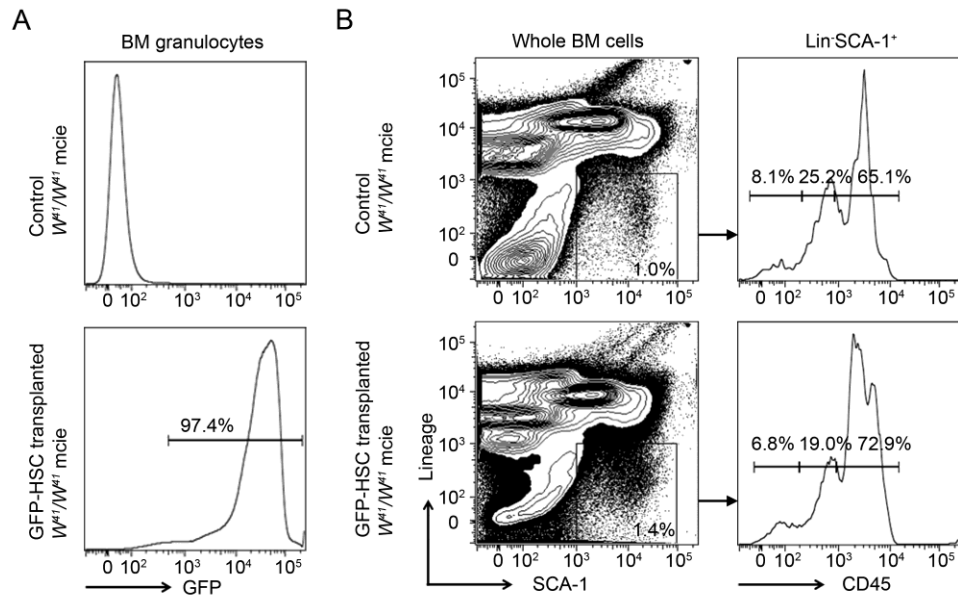

**Figure S4. Analysis of Bone Marrow from Mice with EGFP<sup>+</sup>-HSC Transplants, Related to Figure 4.** (A) FACS analysis of GFP<sup>+</sup> cells in BM granulocytes from control mice (upper) and mice, 3 months after they were irradiated and received intravenous transplants of  $10^2$  long-term HSCs (lower). (B) A representative histogram of CD45 expression within the BM Lin<sup>-</sup>SCA-1<sup>+</sup> fraction from control mice (right upper) and transplant-recipient mice (right lower) 3 months after transplantation. Data were similar in three independent experiments.



**Table S1. Hierarchy of FACS gating and frequency of populations, Related to Figure**

**1.**

| <b>Population</b>                   | <b>Frequency</b><br>(% of lysis-buffer-treated BM, mean $\pm$ SD, n=22) |
|-------------------------------------|-------------------------------------------------------------------------|
| FSC & SSC gated                     | 37.28 $\pm$ 2.79                                                        |
| SYTOX-Blue <sup>-</sup>             | 32.94 $\pm$ 2.68                                                        |
| Lin <sup>-</sup> SCA-1 <sup>+</sup> | 0.489 $\pm$ 0.095                                                       |
| CD45 <sup>-</sup>                   | 0.027 $\pm$ 0.013                                                       |
| FSC <sup>lo</sup>                   | 0.024 $\pm$ 0.009                                                       |
| FSC <sup>hi</sup>                   | 0.001 $\pm$ 0.001                                                       |
| CD45 <sup>int</sup>                 | 0.070 $\pm$ 0.027                                                       |
| FSC <sup>lo</sup>                   | 0.041 $\pm$ 0.017                                                       |
| FSC <sup>hi</sup>                   | 0.019 $\pm$ 0.010                                                       |
| CD45 <sup>hi</sup>                  | 0.385 $\pm$ 0.011                                                       |
| FSC <sup>lo</sup>                   | 0.023 $\pm$ 0.010                                                       |
| FSC <sup>hi</sup>                   | 0.331 $\pm$ 0.058                                                       |

FSC<sup>lo</sup>, <10  $\mu$ m; FSC<sup>hi</sup>, >10  $\mu$ m.

**Table S2. Age of Mice and Purification strategy for mouse VSEL used by Ratajczak group, Related to Figure 1.**

| Year | Authors              | PMID     | Age of mice used | Purification Strategy                                                                             |
|------|----------------------|----------|------------------|---------------------------------------------------------------------------------------------------|
| 2006 | Kucia M et al.       | 16498386 | 3–4 wk & 1 yr    | CD45 <sup>-</sup> Lin <sup>-</sup> SCA-1 <sup>+</sup>                                             |
| 2008 | Zuba-Surma EK et al. | 18031297 | 4–8 wk           | Size-beads & CD45 <sup>-</sup> Lin <sup>-</sup> SCA-1 <sup>+</sup> 7-AAD <sup>-</sup>             |
| 2008 | Dawn B et al.        | 18420834 | 4–6 wk           | Size-beads & CD45 <sup>-</sup> Lin <sup>-</sup> SCA-1 <sup>+</sup>                                |
| 2008 | Zuba-Surma EK et al. | 18430437 | 6 wk & 15 wk     | Size-beads & CD45 <sup>-</sup> Lin <sup>-</sup> SCA-1 <sup>+</sup>                                |
| 2008 | Kucia M et al.       | 18511604 | 4-6 wk & 1 yr    | CD45 <sup>-</sup> Lin <sup>-</sup> SCA-1 <sup>+</sup>                                             |
| 2008 | Zuba-Surma EK et al. | 18951465 | 4–8 wk           | Size-beads & CD45 <sup>-</sup> Lin <sup>-</sup> SCA-1 <sup>+</sup> 7-AAD <sup>-</sup>             |
| 2009 | Shin DM et al.       | 19641521 | 4–5 wk           | Size by lymphoid cells & CD45 <sup>-</sup> Lin <sup>-</sup> SCA-1 <sup>+</sup>                    |
| 2010 | Shin DM et al.       | 20508611 | 4–5 wk           | CD45 <sup>-</sup> Lin <sup>-</sup> SCA-1 <sup>+</sup>                                             |
| 2010 | Wojakowski W et al.  | 20596650 | 4–8 wk           | Size-beads & CD45 <sup>-</sup> Lin <sup>-</sup> SCA-1 <sup>+</sup>                                |
| 2011 | Zuba-Surma EK et al. | 20629987 | 4–6 wk           | Size by lymphoid cells & CD45 <sup>-</sup> Lin <sup>-</sup> SCA-1 <sup>+</sup>                    |
| 2011 | Ratajczak J et al.   | 21034791 | 4-8 wk           | Size by lymphoid cells & CD45 <sup>-</sup> Lin <sup>-</sup> SCA-1 <sup>+</sup> 7-AAD <sup>-</sup> |
| 2012 | Shin DM et al.       | 22023227 | 4–5 wk           | CD45 <sup>-</sup> Lin <sup>-</sup> SCA-1 <sup>+</sup>                                             |

**Table S3. Primer sequences for *Oct4*, Related to Figure 3.**

| Pair |           | Sequence                     | Amplicon size | Reference                                            |
|------|-----------|------------------------------|---------------|------------------------------------------------------|
| 1    | Sense     | 5'-CACGAGTGGAAAGCAACTCA      | 246bp         | Toyooka et al., 2008                                 |
|      | Antisense | 5'-AGATGGTGGTCTGGCTGAAC      |               |                                                      |
| 2    | Sense     | 5'-ACCTTCAGGAGATATGCAAATCG   | 70bp          | Kucia et al. 2006a                                   |
|      | Antisense | 5'-TTCTCAATGCTAGTTCGCTTTCTCT |               |                                                      |
| 3    | Sense     | 5'-AGTTGGCGTGGAGACTTTGC      | 160bp         | Liu et al. 2009                                      |
|      | Antisense | 5'-CAGGGCTTTCATGTCCTGG       |               |                                                      |
| 4    | Sense     | 5'-TACAGCAGATCACTCACATCG     | 133bp         | Mm.PT.51.7439100.g<br>Integrated DNA<br>Technologies |
|      | Antisense | 5'-GTAGCCTCATACTCTTCTCGTTG   |               |                                                      |
|      | Probe     | 5'-ACCACATCCTTCTCTAGCCCAAGC  |               |                                                      |
